# Supplementary material for: Diverse Marine T4-like Cyanophage Communities Are Primarily Comprised of Low-Abundance Species Including Species with Distinct Seasonal, Persistent, Occasional, or Sporadic Dynamics
Source: MDPI journal article supplement (doi:10.3390/v15020581), 2023-02-20
Supplement: s1 [file s1]

**Supplementary Material** for Dart et al. “Diverse marine T4-like cyanophage communities are primarily comprised of low-abundance species with distinct seasonal, persistent, occasional or sporadic dynamics”

**File S1.** File, in fasta format, containing the T4-like cyanophage *gp43* sequences assembled from metagenomes using Xander.

**Table S1.** Sample information including date, library size, *gp43* depth, and the number of viral species.

| Sample Date | ITS ASV data available | Total number of reads in library | No. of viral species shared between size fractions | Viral fraction metagenomes                  |                        |                      |                                                | Cellular fraction metagenomes |                                             |                        |                      |                                                  |
|-------------|------------------------|----------------------------------|----------------------------------------------------|---------------------------------------------|------------------------|----------------------|------------------------------------------------|-------------------------------|---------------------------------------------|------------------------|----------------------|--------------------------------------------------|
|             |                        |                                  |                                                    | Percent of reads that mapped to <i>gp43</i> | Total <i>gp43</i> RPKM | No. of viral species | % of species also found in the cellular sample | Total no. of reads in library | Percent of reads that mapped to <i>gp43</i> | Total <i>gp43</i> RPKM | No. of viral species | % of species also found in viral fraction sample |
| May 2009    | Yes                    | NA                               | NA                                                 | NA                                          | NA                     | NA                   | NA                                             | 22996916                      | 0.00065                                     | 1421909                | 37                   | NA                                               |
| Jun 2009    | Yes                    | NA                               | NA                                                 | NA                                          | NA                     | NA                   | NA                                             | 26900748                      | 0.00042                                     | 1660784                | 34                   | NA                                               |
| Jul 2009    | No                     | 116113800                        | 79                                                 | 0.0049                                      | 2495556                | 182                  | 46                                             | 26108150                      | 0.00211                                     | 1597399                | 83                   | 95                                               |
| Aug 2009    | No                     | 136404488                        | 49                                                 | 0.0022                                      | 2533093                | 162                  | 37                                             | 28306430                      | 0.00080                                     | 1833675                | 60                   | 82                                               |
| Sep 2009    | No                     | 145676882                        | 36                                                 | 0.0063                                      | 2504016                | 143                  | 28                                             | 38964758                      | 0.00081                                     | 2032230                | 40                   | 90                                               |
| Oct 2009    | No                     | 148070378                        | NA                                                 | 0.0057                                      | 2492199                | 180                  | NA                                             | NA                            | NA                                          | NA                     | NA                   | NA                                               |
| Nov 2009    | No                     | NA                               | NA                                                 | NA                                          | NA                     | NA                   | NA                                             | NA                            | NA                                          | NA                     | NA                   | NA                                               |
| Dec 2009    | Yes                    | 142425786                        | 75                                                 | 0.0069                                      | 2487968                | 196                  | 42                                             | 30276798                      | 0.00143                                     | 1297380                | 82                   | 91                                               |
| Jan 2010    | Yes                    | NA                               | NA                                                 | NA                                          | NA                     | NA                   | NA                                             | 31403772                      | 0.00056                                     | 1517868                | 35                   | NA                                               |
| Feb 2010    | Yes                    | 139674392                        | 53                                                 | 0.0043                                      | 2504793                | 166                  | 36                                             | 32357404                      | 0.00086                                     | 1227464                | 60                   | 88                                               |
| Mar 2010    | Yes                    | 126935932                        | 24                                                 | 0.0043                                      | 2490523                | 154                  | 16                                             | 47406330                      | 0.00030                                     | 1606528                | 24                   | 100                                              |
| Apr 2010    | Yes                    | 107296704                        | 31                                                 | 0.0019                                      | 2500870                | 97                   | 49                                             | 44924100                      | 0.00039                                     | 1704276                | 48                   | 65                                               |
| May 2010    | No                     | 109992458                        | NA                                                 | 0.0014                                      | 2662662                | 62                   | NA                                             | NA                            | NA                                          | NA                     | NA                   | NA                                               |
| Jun 2010    | No                     | 134357962                        | 43                                                 | 0.0047                                      | 2497537                | 165                  | 27                                             | 28012512                      | 0.00069                                     | 1715258                | 44                   | 98                                               |
| Jul 2010    | Yes                    | 157388460                        | 52                                                 | 0.0044                                      | 2455455                | 152                  | 36                                             | 19321836                      | 0.00141                                     | 1780861                | 55                   | 95                                               |
| Aug 2010    | Yes                    | 170333992                        | 81                                                 | 0.0075                                      | 2453894                | 155                  | 59                                             | 30376372                      | 0.00226                                     | 1890456                | 92                   | 88                                               |
| Sep 2010    | Yes                    | 165702952                        | 51                                                 | 0.0049                                      | 2474422                | 162                  | 32                                             | 13773876                      | 0.00149                                     | 1980964                | 52                   | 98                                               |
| Oct 2010    | Yes                    | 147732982                        | NA                                                 | 0.0045                                      | 2541901                | 126                  | NA                                             | NA                            | NA                                          | NA                     | NA                   | NA                                               |
| Nov 2010    | Yes                    | 173384756                        | 25                                                 | 0.0036                                      | 2553286                | 154                  | 21                                             | 23533836                      | 0.00048                                     | 2032657                | 33                   | 76                                               |
| Dec 2010    | Yes                    | 137194150                        | 14                                                 | 0.0033                                      | 2548851                | 135                  | 12                                             | 27354550                      | 0.00024                                     | 1780099                | 16                   | 88                                               |
| Jan 2011    | Yes                    | 118386432                        | 18                                                 | 0.0013                                      | 2594393                | 60                   | 40                                             | 49042368                      | 0.00021                                     | 1597328                | 24                   | 75                                               |
| Feb 2011    | No                     | 151278558                        | 31                                                 | 0.0041                                      | 2528740                | 111                  | 35                                             | 50884410                      | 0.00029                                     | 1759264                | 39                   | 79                                               |
| Mar 2011    | Yes                    | NA                               | NA                                                 | NA                                          | NA                     | NA                   | NA                                             | 10387850                      | 0.00029                                     | 1247597                | 8                    | NA                                               |
| Apr 2011    | Yes                    | 133276076                        | 100                                                | 0.0088                                      | 2430730                | 136                  | 84                                             | 57293082                      | 0.00327                                     | 1939106                | 114                  | 88                                               |
| May 2011    | No                     | 139042854                        | 54                                                 | 0.0083                                      | 2424072                | 147                  | 38                                             | 25713414                      | 0.00120                                     | 1647686                | 56                   | 96                                               |
| Jun 2011    | Yes                    | 132644724                        | 60                                                 | 0.0043                                      | 2532560                | 136                  | 50                                             | 49135112                      | 0.00070                                     | 1876349                | 68                   | 88                                               |

|          |     |           |     |        |         |     |     |           |         |         |     |    |
|----------|-----|-----------|-----|--------|---------|-----|-----|-----------|---------|---------|-----|----|
| Jul 2011 | No  | 134825504 | 88  | 0.0060 | 2465323 | 156 | 64  | 30862122  | 0.00308 | 1778676 | 100 | 88 |
| Aug 2011 | No  | 127223314 | 16  | 0.0038 | 2482495 | 139 | 14  | 15565636  | 0.00052 | 1851122 | 19  | 84 |
| Sep 2011 | No  | 118697928 | 33  | 0.0022 | 2562899 | 71  | 75  | 49141356  | 0.00060 | 1900052 | 53  | 62 |
| Oct 2011 | Yes | 131028066 | NA  | 0.0029 | 2554200 | 87  | NA  | NA        | NA      | NA      | NA  | NA |
| Nov 2011 | No  | 150134260 | 39  | 0.0076 | 2513483 | 161 | 29  | 19575554  | 0.00090 | 1579206 | 47  | 83 |
| Dec 2011 | Yes | 171587856 | NA  | 0.0076 | 2508539 | 180 | NA  | NA        | NA      | NA      | NA  | NA |
| Jan 2012 | Yes | 139282760 | 87  | 0.0055 | 2478135 | 153 | 71  | 52809186  | 0.00188 | 1791763 | 108 | 81 |
| Feb 2012 | Yes | 140166006 | 88  | 0.0066 | 2468609 | 182 | 54  | 49075018  | 0.00180 | 1798970 | 99  | 89 |
| Mar 2012 | Yes | NA        | NA  | NA     | NA      | NA  | NA  | 37046584  | 0.00131 | 2019903 | 66  | NA |
| Apr 2012 | No  | NA        | NA  | NA     | NA      | NA  | NA  | NA        | NA      | NA      | NA  | NA |
| May 2012 | Yes | 136156396 | NA  | 0.0050 | 2531398 | 163 | NA  | NA        | NA      | NA      | NA  | NA |
| Jun 2012 | Yes | 163606112 | 109 | 0.0088 | 2447780 | 186 | 65  | 48477416  | 0.00236 | 1809541 | 120 | 91 |
| Jul 2012 | Yes | 154660850 | 103 | 0.0069 | 2500639 | 221 | 53  | 24682512  | 0.00246 | 1784990 | 118 | 87 |
| Aug 2012 | Yes | 160152640 | 36  | 0.0155 | 2417371 | 163 | 47  | 36264888  | 0.00101 | 1742575 | 76  | 47 |
| Sep 2012 | Yes | 515444920 | NA  | 0.0075 | 2513683 | 201 | NA  | NA        | NA      | NA      | NA  | NA |
| Oct 2012 | Yes | NA        | NA  | NA     | NA      | NA  | NA  | 151191326 | 0.00158 | 1377198 | 157 | NA |
| Nov 2012 | Yes | 160169864 | 154 | 0.0104 | 2484180 | 184 | 102 | 120863368 | 0.00328 | 1467804 | 188 | 82 |
| Dec 2012 | Yes | 131348436 | 114 | 0.0095 | 2468132 | 162 | 90  | 62401006  | 0.00222 | 1620876 | 145 | 79 |
| Jan 2013 | Yes | 133017464 | 37  | 0.0030 | 2533561 | 109 | 47  | 34720408  | 0.00068 | 1594313 | 51  | 73 |
| Feb 2013 | Yes | 134295608 | 56  | 0.0086 | 2444807 | 149 | 44  | 23218858  | 0.00169 | 1867558 | 65  | 86 |
| Mar 2013 | Yes | 133767562 | 66  | 0.0037 | 2472945 | 123 | 63  | 53685386  | 0.00087 | 1735602 | 78  | 85 |
| Apr 2013 | Yes | 129689028 | 88  | 0.0077 | 2426908 | 133 | 74  | 38636842  | 0.00305 | 1834998 | 99  | 89 |
| May 2013 | Yes | 149622916 | NA  | 0.0049 | 2497764 | 149 | NA  | NA        | NA      | NA      | NA  | NA |
| Jun 2013 | No  | 112206560 | NA  | 0.0052 | 2535350 | 141 | NA  | NA        | NA      | NA      | NA  | NA |
| Jul 2013 | Yes | 92909168  | NA  | 0.0029 | 2504018 | 137 | NA  | NA        | NA      | NA      | NA  | NA |
| Aug 2013 | Yes | 161873630 | NA  | 0.0045 | 2486676 | 198 | NA  | NA        | NA      | NA      | NA  | NA |
| Sep 2013 | Yes | 176399532 | NA  | 0.0038 | 2511056 | 207 | NA  | NA        | NA      | NA      | NA  | NA |
| Oct 2013 | Yes | NA        | NA  | NA     | NA      | NA  | NA  | NA        | NA      | NA      | NA  | NA |
| Nov 2013 | Yes | 135269650 | NA  | 0.0057 | 2500560 | 195 | NA  | NA        | NA      | NA      | NA  | NA |
| Dec 2013 | Yes | 147785986 | NA  | 0.0058 | 2498068 | 135 | NA  | NA        | NA      | NA      | NA  | NA |
| Jan 2014 | No  | 153897306 | NA  | 0.0087 | 2496108 | 184 | NA  | NA        | NA      | NA      | NA  | NA |
| Feb 2014 | No  | 162325522 | NA  | 0.0082 | 2475969 | 170 | NA  | NA        | NA      | NA      | NA  | NA |
| Mar 2014 | No  | NA        | NA  | NA     | NA      | NA  | NA  | NA        | NA      | NA      | NA  | NA |
| Apr 2014 | No  | 175307902 | NA  | 0.0010 | 2494438 | 120 | NA  | NA        | NA      | NA      | NA  | NA |
| May 2014 | No  | 78821612  | NA  | 0.0036 | 2463488 | 141 | NA  | NA        | NA      | NA      | NA  | NA |
| Jun 2014 | No  | NA        | NA  | NA     | NA      | NA  | NA  | NA        | NA      | NA      | NA  | NA |
| Jul 2014 | No  | NA        | NA  | NA     | NA      | NA  | NA  | NA        | NA      | NA      | NA  | NA |
| Aug 2014 | No  | NA        | NA  | NA     | NA      | NA  | NA  | NA        | NA      | NA      | NA  | NA |
| Sep 2014 | No  | 107737506 | NA  | 0.0111 | 2465536 | 165 | NA  | NA        | NA      | NA      | NA  | NA |

**Table S2.** Accession numbers of cyanophage genome and *gp43* sequences used in study.

| <b>Cyanophage genomes used in this study</b>                                                                                                                                                                                                                                                                                                                                                                                                                                                                                                                                                                                                                                                                                                                                                                                                                                                                                                                                                                                                                                                                                                                                                                                                                                                                                                                                                                                                                                                                                                                                                                                                                                                                                                                                                                                                                                                                                                                                                                                                                                                                                                                                                                                                                                                                                                                                                                                                                                                                                                                                                                                                                                                                                                                                                                                                                                                                                                                                                                                                                                                                                                                                                                                                                                                                                                                                                                                                                                                                                                                                                                                                         |  |
|------------------------------------------------------------------------------------------------------------------------------------------------------------------------------------------------------------------------------------------------------------------------------------------------------------------------------------------------------------------------------------------------------------------------------------------------------------------------------------------------------------------------------------------------------------------------------------------------------------------------------------------------------------------------------------------------------------------------------------------------------------------------------------------------------------------------------------------------------------------------------------------------------------------------------------------------------------------------------------------------------------------------------------------------------------------------------------------------------------------------------------------------------------------------------------------------------------------------------------------------------------------------------------------------------------------------------------------------------------------------------------------------------------------------------------------------------------------------------------------------------------------------------------------------------------------------------------------------------------------------------------------------------------------------------------------------------------------------------------------------------------------------------------------------------------------------------------------------------------------------------------------------------------------------------------------------------------------------------------------------------------------------------------------------------------------------------------------------------------------------------------------------------------------------------------------------------------------------------------------------------------------------------------------------------------------------------------------------------------------------------------------------------------------------------------------------------------------------------------------------------------------------------------------------------------------------------------------------------------------------------------------------------------------------------------------------------------------------------------------------------------------------------------------------------------------------------------------------------------------------------------------------------------------------------------------------------------------------------------------------------------------------------------------------------------------------------------------------------------------------------------------------------------------------------------------------------------------------------------------------------------------------------------------------------------------------------------------------------------------------------------------------------------------------------------------------------------------------------------------------------------------------------------------------------------------------------------------------------------------------------------------------------|--|
| AJ630128.1,AY939844.2,AY940168.2,DQ149023.2,FM207411.1,GU071092.1,GU071094.1,GU071095.1,GU071096.1,GU071097.1,GU071098.1,GU071099.1,GU071101.1,GU071103.1,GU071105.1,GU071106.1,GU071108.1,GU075905.1,HQ316583.1,HQ316603.1,HQ317290.1,HQ317291.1,HQ317292.1,HQ317383.1,HQ317385.1,HQ317391.1,HQ337021.1,HQ615693.1,HQ632825.1,HQ633071.1,HQ634174.1,HQ634175.1,HQ634176.1,HQ634177.1,HQ634178.1,HQ634189.1,HQ634190.1,HQ634191.1,HQ634193.1,JF974288.1,JF974289.1,JF974292.1,JF974293.1,JN371768.1,JN371769.1,KF156338.1,KF156339.1,KF156340.1,KJ019026.1,KJ019027.1,KJ019028.1,KJ019029.1,KJ019030.1,KJ019031.1,KJ019032.1,KJ019033.1,KJ019034.1,KJ019035.1,KJ019036.1,KJ019037.1,KJ019038.1,KJ019039.1,KJ019040.1,KJ019041.1,KJ019042.1,KJ019043.1,KJ019044.1,KJ019045.1,KJ019046.1,KJ019047.1,KJ019048.1,KJ019049.1,KJ019050.1,KJ019051.1,KJ019052.1,KJ019053.1,KJ019054.1,KJ019055.1,KJ019056.1,KJ019057.1,KJ019058.1,KJ019059.1,KJ019060.1,KJ019061.1,KJ019062.1,KJ019063.1,KJ019064.1,KJ019065.1,KJ019066.1,KJ019067.1,KJ019068.1,KJ019069.1,KJ019070.1,KJ019071.1,KJ019072.1,KJ019073.1,KJ019074.1,KJ019075.1,KJ019076.1,KJ019077.1,KJ019078.1,KJ019079.1,KJ019080.1,KJ019081.1,KJ019082.1,KJ019083.1,KJ019084.1,KJ019085.1,KJ019086.1,KJ019087.1,KJ019088.1,KJ019089.1,KJ019090.1,KJ019091.1,KJ019092.1,KJ019093.1,KJ019094.1,KJ019095.1,KJ019096.1,KJ019097.1,KJ019098.1,KJ019099.1,KJ019100.1,KJ019101.1,KJ019102.1,KJ019103.1,KJ019104.1,KJ019105.1,KJ019106.1,KJ019107.1,KJ019108.1,KJ019109.1,KJ019110.1,KJ019111.1,KJ019112.1,KJ019113.1,KJ019114.1,KJ019115.1,KJ019116.1,KJ019117.1,KJ019118.1,KJ019119.1,KJ019120.1,KJ019121.1,KJ019122.1,KJ019123.1,KJ019124.1,KJ019125.1,KJ019126.1,KJ019127.1,KJ019128.1,KJ019129.1,KJ019130.1,KJ019131.1,KJ019132.1,KJ019133.1,KJ019134.1,KJ019135.1,KJ019136.1,KJ019137.1,KJ019138.1,KJ019139.1,KJ019140.1,KJ019141.1,KJ019142.1,KJ019143.1,KJ019144.1,KJ019145.1,KJ019146.1,KJ019147.1,KJ019148.1,KJ019149.1,KJ019150.1,KJ019151.1,KJ019152.1,KJ019153.1,KJ019154.1,KJ019155.1,KJ019156.1,KJ019157.1,KJ019158.1,KJ019159.1,KJ019160.1,KJ019161.1,KJ019162.1,KJ019163.1,KJ019164.1,KJ019165.1,KM359505.1,KP211958.1,KU594605.1,KU594607.1,KU686192.1,KU686193.1,KU686194.1,KU686195.1,KU686196.1,KU686197.1,KU686198.1,KU686199.1,KU686200.1,KU686201.1,KU686202.1,KU686203.1,KU686204.1,KU686205.1,KU686206.1,KU686207.1,KU686208.1,KU686209.1,KU686210.1,KU686211.1,KU686212.1,KU686213.1,KX349226.1,KX349227.1,KX349228.1,KX349229.1,KX349230.1,KX349231.1,KX349232.1,KX349233.1,KX349234.1,KX349235.1,KX349236.1,KX349237.1,KX349238.1,KX349239.1,KX349240.1,KX349241.1,KX349242.1,KX349243.1,KX349244.1,KX349245.1,KX349246.1,KX349247.1,KX349248.1,KX349249.1,KX349250.1,KX349251.1,KX349252.1,KX349253.1,KX349254.1,KX349255.1,KX349256.1,KX349257.1,KX349258.1,KX349259.1,KX349260.1,KX349261.1,KX349262.1,KX349263.1,KX349264.1,KX349265.1,KX349266.1,KX349267.1,KX349268.1,KX349269.1,KX349270.1,KX349271.1,KX349272.1,KX349273.1,KX349274.1,KX349275.1,KX349276.1,KX349277.1,KX349278.1,KX349279.1,KX349280.1,KX349281.1,KX349282.1,KX349283.1,KX349284.1,KX349285.1,KX349286.1,KX349287.1,KX349288.1,KX349289.1,KX349290.1,KX349291.1,KX349292.1,KX349293.1,KX349294.1,KX349295.1,KX349296.1,KX349297.1,KX349298.1,KX349299.1,KX349300.1,KX349301.1,KX349302.1,KX349303.1,KX349304.1,KX349305.1,KX349306.1,KX349307.1,KX349308.1,KX349309.1,KX349310.1,KX349311.1,KX349312.1,KX349313.1,KX349314.1,KX349315.1,KX349316.1,KX349317.1,KX349318.1,KX349319.1,KX349320.1,KX349321.1,KX349322.1,KX349323.1,KX349324.1,KX349325.1,KX349326.1,KX349327.1,KY945241.1,LN828717.1,MF351863.1 |  |
| <b>Cyanophage <i>gp43</i> gene sequence amplicons from environmental samples used in this study</b>                                                                                                                                                                                                                                                                                                                                                                                                                                                                                                                                                                                                                                                                                                                                                                                                                                                                                                                                                                                                                                                                                                                                                                                                                                                                                                                                                                                                                                                                                                                                                                                                                                                                                                                                                                                                                                                                                                                                                                                                                                                                                                                                                                                                                                                                                                                                                                                                                                                                                                                                                                                                                                                                                                                                                                                                                                                                                                                                                                                                                                                                                                                                                                                                                                                                                                                                                                                                                                                                                                                                                  |  |
| FJ874707.1,FJ874706.1,FJ874705.1,FJ874704.1,FJ874703.1,FJ874696.1,FJ874697.1,FJ874698.1,FJ874699.1,FJ874700.1,FJ874701.1,FJ874702.1,FJ874684.1,FJ874685.1,FJ874686.1,FJ874687.1,FJ874688.1,FJ874689.1,FJ874690.1,FJ874691.1,FJ874692.1,FJ874693.1,FJ874694.1,FJ874695.1,FJ874732.1,FJ874733.1,FJ874674.1,FJ874675.1,FJ874676.1,FJ874677.1,FJ874678.1,FJ874679.1,FJ874680.1,FJ874681.1,FJ874682.1,FJ874683.1,FJ874717.1,FJ874718.1,FJ874719.1,FJ874720.1,FJ874721.1,FJ874722.1,FJ874723.1,FJ874724.1,FJ874725.1,FJ874726.1,FJ874727.1,FJ874728.1,FJ874729.1,FJ874730.1,FJ874731.1,FJ874716.1,FJ874715.1,JX911892.1,JX911893.1,JX911894.1,FJ874708.1,FJ874709.1,FJ874710.1,FJ874711.1,FJ874712.1,FJ874713.1,FJ874714.1,JX911883.1,JX911884.1,JX911885.1,JX911886.1,JX911887.1,JX911888.1,JX911889.1,JX911890.1,JX911891.1,JX911868.1,JX911869.1,JX911870.1,JX911871.1,JX911872.1,JX911873.1,JX911874.1,JX911875.1,JX911876.1,JX911877.1,JX911878.1,JX911879.1,JX911880.1,JX911881.1,JX911882.1,JX911853.1,JX911854.1,JX911855.1,JX911856.1,JX911857.1,JX911858.1,JX911859.1,JX911861.1,JX911860.1,JX911862.1,JX911863.1,JX911864.1,JX911865.1,JX911866.1,JX911867.1,JX911837.1,JX911838.1,JX911839.1,JX911840.1,JX911841.1,JX911842.1,JX911843.1,JX911844.1,JX911845.1,JX911846.1,JX911847.1,JX911848.1,JX911849.1,JX911850.1,JX911851.1,JX911852.1,JX911824.1,JX911825.1,JX911826.1,JX911827.1,JX911828.1,JX911829.1,JX911830.1,JX911831.1,JX911832.1,JX911834.1,JX911833.1,JX911835.1,JX911836.1,JX911810.1,JX911811.1,JX911812.1,JX911813.1,JX911814.1,JX911815.1,JX911816.1,JX911823.1,JX911822.1,JX911821.1,JX911820.1,JX911819.1,JX911818.1,JX911817.1,JX911795.1,JX911796.1,JX911797.1,JX911798.1,JX911799.1,JX911800.1,JX911801.1,JX911802.1,JX911803.1,JX911804.1,JX911805.1,JX911806.1,JX911807.1,JX911808.1,JX911809.1,JX911780.1,JX911781.1,JX911782.1,JX911783.1,JX911784.1,JX911785.1,JX911786.1,JX911787.1,JX911788.1,JX911789.1,JX911794.1,JX911793.1,JX911792.1,JX911791.1,JX911790.1,JX911766.1,JX911767.1,JX911768.1,JX911769.1,JX911770.1,JX911771.1,JX911772.1,JX911773.1,JX911774.1,JX911775.1,JX911776.1,JX911777.1,JX911778.1,JX911779.1,JX911755.1,JX911756.1,JX911757.1,JX911758.1,JX911759.1,JX911760.1,JX911761.1,JX911763.1,JX911762.1,JX911764.1,JX911765.1                                                                                                                                                                                                                                                                                                                                                                                                                                                                                                                                                                                                                                                                                                                                                                                                                                                                                                                                                                                                                                                                                                                                                                                                                                                                                                                                                              |  |

**Table S3.** The dynamic class categorization of each viral species according to the virome or cellular metagenome. Highlighted species are those that fit the persistent criterion and have a significant seasonal spline ( $n=12$ ).

| Phage Species                             | Virome Dynamic Category | Cellular Metagenome Dynamic Category |
|-------------------------------------------|-------------------------|--------------------------------------|
| APR2010meta_g43_contig_1756_contig_1757   | occasional              | occasional                           |
| APR2010meta_g43_contig_5750_contig_5751   | occasional              | sporadic                             |
| APR2010meta_g43_contig_686_contig_687     | occasional              | sporadic                             |
| APR2011meta_g43_contig_17406_contig_17407 | occasional              | occasional                           |
| APR2011meta_g43_contig_2976_contig_2977   | occasional              | occasional                           |
| APR2011meta_g43_contig_2990_contig_2991   | occasional              | sporadic                             |
| APR2013meta_g43_contig_2306_contig_2307   | occasional              | occasional                           |
| APRIL2011_g43_contig_2434_contig_2435     | occasional              | sporadic                             |
| APRIL2011_g43_contig_2524_contig_2525     | occasional              | occasional                           |
| AUG2009_g43_contig_3244_contig_3245       | occasional              | sporadic                             |
| AUG2009_g43_contig_6796_contig_6797       | occasional              | sporadic                             |
| AUG2009meta_g43_contig_6_contig_7         | occasional              | sporadic                             |
| AUG2009meta_g43_contig_70_contig_71       | occasional              | sporadic                             |
| AUG2011_g43_contig_2224_contig_2225       | occasional              | sporadic                             |
| AUG2012meta_g43_contig_5296_contig_5297   | occasional              | seasonal                             |
| AUG2012meta_g43_contig_6_contig_7         | occasional              | occasional                           |
| AUG2012meta_g43_contig_6308_contig_6309   | occasional              | seasonal                             |
| AUG2013_g43_contig_3636_contig_3637       | occasional              | sporadic                             |
| AUG2013_g43_contig_806_contig_807         | occasional              | sporadic                             |
| DEC2009_g43_contig_6362_contig_6363       | occasional              | occasional                           |
| DEC2011_g43_contig_27142_contig_27143     | occasional              | Not found in cellular metagenome     |
| DEC2011_g43_contig_27756_contig_27757     | occasional              | sporadic                             |
| DEC2012meta_g43_contig_102_contig_103     | occasional              | sporadic                             |
| DEC2012meta_g43_contig_11250_contig_11251 | occasional              | sporadic                             |
| DEC2012meta_g43_contig_22134_contig_22135 | occasional              | occasional                           |
| DEC2012meta_g43_contig_4830_contig_4831   | occasional              | occasional                           |
| DEC2013_g43_contig_998_contig_999         | occasional              | seasonal                             |
| FEB2010_g43_contig_3428_contig_3429       | occasional              | sporadic                             |
| FEB2013meta_g43_contig_2200_contig_2201   | occasional              | occasional                           |
| Ga0181379_1000073bs                       | occasional              | sporadic                             |
| Ga0181379_1000119bs                       | occasional              | sporadic                             |
| Ga0181379_1024068bs                       | occasional              | occasional                           |
| Ga0181379_1078211bs                       | occasional              | occasional                           |
| Ga0181385_1029211bs                       | occasional              | sporadic                             |
| Ga0181386_1126711bs                       | occasional              | sporadic                             |
| Ga0181389_1000663bs                       | occasional              | seasonal                             |
| Ga0181389_1105770bs                       | occasional              | Not found in cellular metagenome     |
| Ga0181398_1000002bs                       | occasional              | occasional                           |
| Ga0181398_1012449bs                       | occasional              | sporadic                             |
| Ga0181398_1035252bs                       | occasional              | occasional                           |
| Ga0181399_1015076bs                       | occasional              | occasional                           |
| Ga0181399_1176683bs                       | occasional              | occasional                           |
| Ga0181400_1014569bs                       | occasional              | sporadic                             |
| Ga0181404_1130934bs                       | occasional              | sporadic                             |
| Ga0181406_1025137bs                       | occasional              | occasional                           |
| Ga0181406_1054155bs                       | occasional              | seasonal                             |
| Ga0181406_1072413bs                       | occasional              | occasional                           |

|                                           |            |                                  |
|-------------------------------------------|------------|----------------------------------|
| Ga0181407_1008799bs                       | occasional | occasional                       |
| Ga0181409_1027155bs                       | occasional | sporadic                         |
| Ga0181410_1183833bs                       | occasional | occasional                       |
| Ga0181411_1014521bs                       | occasional | seasonal                         |
| Ga0181411_1032064bs                       | occasional | sporadic                         |
| Ga0181411_1042452bs                       | occasional | occasional                       |
| Ga0181411_1262948bs                       | occasional | occasional                       |
| Ga0181412_1007830bs                       | occasional | occasional                       |
| Ga0181412_1011781bs                       | occasional | occasional                       |
| Ga0181412_1014409bs                       | occasional | occasional                       |
| Ga0181412_1049517bs                       | occasional | sporadic                         |
| Ga0181413_1001400bs                       | occasional | seasonal                         |
| Ga0181414_1020179bs                       | occasional | occasional                       |
| Ga0181414_1105086bs                       | occasional | sporadic                         |
| Ga0181414_1149305bs                       | occasional | sporadic                         |
| Ga0181415_1011777bs                       | occasional | sporadic                         |
| Ga0181415_1012161bs                       | occasional | occasional                       |
| Ga0181415_1098829bs                       | occasional | sporadic                         |
| Ga0181417_1004373bs                       | occasional | seasonal                         |
| Ga0181418_1011334bs                       | occasional | occasional                       |
| Ga0181420_1011385bs                       | occasional | sporadic                         |
| Ga0181420_1014304bs                       | occasional | sporadic                         |
| Ga0181422_1120276bs                       | occasional | sporadic                         |
| Ga0181423_1479109bs                       | occasional | sporadic                         |
| Ga0181425_1005938bs                       | occasional | seasonal                         |
| Ga0181427_1004745bs                       | occasional | sporadic                         |
| Ga0181427_1181746bs                       | occasional | sporadic                         |
| Ga0181431_1191606bs                       | occasional | sporadic                         |
| Ga0187218_1099679bs                       | occasional | occasional                       |
| Ga0187219_1070018bs                       | occasional | occasional                       |
| Ga0187220_1147702bs                       | occasional | sporadic                         |
| Ga0187221_1046637bs                       | occasional | sporadic                         |
| Ga0187221_1220806bs                       | occasional | sporadic                         |
| JUL2012meta_g43_contig_7842_contig_7843   | occasional | sporadic                         |
| JUN2012meta_g43_contig_3096_contig_3097   | occasional | occasional                       |
| JUNE2013_g43_contig_1856_contig_1857      | occasional | occasional                       |
| MAR2012meta_g43_contig_1802_contig_1803   | occasional | occasional                       |
| MARCH2010_g43_contig_19402_contig_19403   | occasional | occasional                       |
| MAY2013_g43_contig_16632_contig_16633     | occasional | occasional                       |
| MAY2013_g43_contig_86_contig_87           | occasional | Not found in cellular metagenome |
| NOV2010meta_g43_contig_1164_contig_1165   | occasional | Not found in cellular metagenome |
| NOV2010meta_g43_contig_668_contig_669     | occasional | occasional                       |
| NOV2012_g43_contig_1192_contig_1193       | occasional | sporadic                         |
| NOV2012_g43_contig_16146_contig_16147     | occasional | sporadic                         |
| NOV2013_g43_contig_10492_contig_10493     | occasional | sporadic                         |
| OCT2010_g43_contig_2626_contig_2627       | occasional | occasional                       |
| OCT2012meta_g43_contig_15748_contig_15749 | occasional | sporadic                         |
| SEP2011meta_g43_contig_4244_contig_4245   | occasional | occasional                       |
| SEPT2013_g43_contig_3928_contig_3929      | occasional | sporadic                         |
| SEPT2014_g43_contig_4386_contig_4387      | occasional | sporadic                         |
| SEPT2014_g43_contig_4626_contig_4627      | occasional | sporadic                         |
| APR2010_g43_contig_1666_contig_1667       | persistent | occasional                       |
| APR2010meta_g43_contig_1204_contig_1205   | persistent | seasonal                         |
| APR2010meta_g43_contig_1210_contig_1211   | persistent | occasional                       |
| APR2010meta_g43_contig_168_contig_169     | persistent | seasonal                         |
| APR2011meta_g43_contig_16578_contig_16579 | persistent | occasional                       |

|                                           |            |            |
|-------------------------------------------|------------|------------|
| APR2011meta g43 contig 2826 contig 2827   | persistent | occasional |
| APR2013meta g43 contig 10 contig 11       | persistent | occasional |
| AUG2009 g43 contig 3196 contig 3197       | persistent | persistent |
| AUG2009meta g43 contig 1382 contig 1383   | persistent | occasional |
| AUG2010 g43 contig 16066 contig 16067     | persistent | occasional |
| AUG2011 g43 contig 760 contig 761         | persistent | occasional |
| AUG2012 g43 contig 23330 contig 23331     | persistent | sporadic   |
| AUG2012meta g43 contig 2074 contig 2075   | persistent | occasional |
| DEC2009meta g43 contig 4946 contig 4947   | persistent | seasonal   |
| DEC2009meta g43 contig 846 contig 847     | persistent | occasional |
| DEC2013 g43 contig 2926 contig 2927       | persistent | occasional |
| FEB2012meta g43 contig 3218 contig 3219   | persistent | occasional |
| Ga0181379 1030656bs                       | persistent | occasional |
| Ga0181387 1041238bs                       | persistent | seasonal   |
| Ga0181388 1004303bs                       | persistent | occasional |
| Ga0181393 1106242bs                       | persistent | occasional |
| Ga0181397 1190031bs                       | persistent | occasional |
| Ga0181400 1039600bs                       | persistent | seasonal   |
| Ga0181405 1071392bs                       | persistent | occasional |
| Ga0181405 1159557bs                       | persistent | occasional |
| Ga0181415 1180415bs                       | persistent | seasonal   |
| Ga0181420 1028594bs                       | persistent | occasional |
| JAN2012meta g43 contig 3468 contig 3469   | persistent | occasional |
| JUNE2012 g43 contig 876 contig 877        | persistent | occasional |
| MAY2012 g43 contig 3340 contig 3341       | persistent | occasional |
| NOV2012meta g43 contig 45718 contig 45719 | persistent | persistent |
| APR2010 g43 contig 1360 contig 1361       | seasonal   | occasional |
| APR2011meta g43 contig 100 contig 101     | seasonal   | occasional |
| APR2011meta g43 contig 15362 contig 15363 | seasonal   | occasional |
| APR2011meta g43 contig 16040 contig 16041 | seasonal   | seasonal   |
| APR2011meta g43 contig 2814 contig 2815   | seasonal   | occasional |
| APR2011meta g43 contig 5562 contig 5563   | seasonal   | occasional |
| APR2011meta g43 contig 6928 contig 6929   | seasonal   | sporadic   |
| APR2011meta g43 contig 6950 contig 6951   | seasonal   | sporadic   |
| APR2013meta g43 contig 1006 contig 1007   | seasonal   | occasional |
| APR2013meta g43 contig 11272 contig 11273 | seasonal   | occasional |
| APR2013meta g43 contig 11976 contig 11977 | seasonal   | occasional |
| APRIL2011 g43 contig 5558 contig 5559     | seasonal   | sporadic   |
| APRIL2013 g43 contig 9510 contig 9511     | seasonal   | sporadic   |
| AUG2009 g43 contig 14954 contig 14955     | seasonal   | sporadic   |
| AUG2009 g43 contig 2706 contig 2707       | seasonal   | sporadic   |
| AUG2009 g43 contig 462 contig 463         | seasonal   | seasonal   |
| AUG2009 g43 contig 66 contig 67           | seasonal   | sporadic   |
| AUG2011 g43 contig 2276 contig 2277       | seasonal   | seasonal   |
| AUG2012 g43 contig 126 contig 127         | seasonal   | sporadic   |
| AUG2012meta g43 contig 5304 contig 5305   | seasonal   | seasonal   |
| AUG2013 g43 contig 648 contig 649         | seasonal   | occasional |
| DEC2009 g43 contig 22484 contig 22485     | seasonal   | occasional |
| DEC2009meta g43 contig 12622 contig 12623 | seasonal   | sporadic   |
| DEC2009meta g43 contig 17638 contig 17639 | seasonal   | seasonal   |
| DEC2010 g43 contig 2388 contig 2389       | seasonal   | sporadic   |
| DEC2010 g43 contig 6908 contig 6909       | seasonal   | sporadic   |
| DEC2010 g43 contig 72 contig 73           | seasonal   | seasonal   |
| DEC2011 g43 contig 6248 contig 6249       | seasonal   | seasonal   |
| DEC2012 g43 contig 18258 contig 18259     | seasonal   | sporadic   |
| DEC2012 g43 contig 20320 contig 20321     | seasonal   | sporadic   |

|                                         |          |            |
|-----------------------------------------|----------|------------|
| DEC2012_g43_contig_572_contig_573       | seasonal | occasional |
| DEC2012_g43_contig_6902_contig_6903     | seasonal | sporadic   |
| DEC2012meta_g43_contig_2120_contig_2121 | seasonal | sporadic   |
| DEC2012meta_g43_contig_4988_contig_4989 | seasonal | seasonal   |
| FEB2010_g43_contig_4670_contig_4671     | seasonal | occasional |
| FEB2011_g43_contig_1556_contig_1557     | seasonal | occasional |
| FEB2013meta_g43_contig_952_contig_953   | seasonal | seasonal   |
| FEB2014_g43_contig_248_contig_249       | seasonal | sporadic   |
| Ga0181379_1000218bs                     | seasonal | occasional |
| Ga0181379_1000684bs                     | seasonal | seasonal   |
| Ga0181379_1002266bs                     | seasonal | seasonal   |
| Ga0181379_1002463bs                     | seasonal | occasional |
| Ga0181379_1002805bs                     | seasonal | seasonal   |
| Ga0181379_1004929bs                     | seasonal | occasional |
| Ga0181379_1005526bs                     | seasonal | seasonal   |
| Ga0181379_1006259bs                     | seasonal | seasonal   |
| Ga0181379_1006576bs                     | seasonal | occasional |
| Ga0181379_1007630bs                     | seasonal | sporadic   |
| Ga0181379_1014234bs                     | seasonal | seasonal   |
| Ga0181379_1014881bs                     | seasonal | seasonal   |
| Ga0181379_1018033bs                     | seasonal | occasional |
| Ga0181379_1028581bs                     | seasonal | sporadic   |
| Ga0181379_1030172bs                     | seasonal | seasonal   |
| Ga0181379_1114691bs                     | seasonal | seasonal   |
| Ga0181379_1254866bs                     | seasonal | sporadic   |
| Ga0181379_1434689bs                     | seasonal | sporadic   |
| Ga0181380_1147619bs                     | seasonal | seasonal   |
| Ga0181385_1000001bs                     | seasonal | sporadic   |
| Ga0181385_1007307bs                     | seasonal | occasional |
| Ga0181385_1015215bs                     | seasonal | sporadic   |
| Ga0181385_1020752bs                     | seasonal | sporadic   |
| Ga0181385_1030233bs                     | seasonal | occasional |
| Ga0181385_1038691bs                     | seasonal | occasional |
| Ga0181385_1069945bs                     | seasonal | seasonal   |
| Ga0181385_1243399bs                     | seasonal | sporadic   |
| Ga0181385_1324766bs                     | seasonal | sporadic   |
| Ga0181386_1011570bs                     | seasonal | sporadic   |
| Ga0181386_1024097bs                     | seasonal | occasional |
| Ga0181386_1070110bs                     | seasonal | seasonal   |
| Ga0181387_1030261bs                     | seasonal | sporadic   |
| Ga0181389_1003911bs                     | seasonal | sporadic   |
| Ga0181393_1032910bs                     | seasonal | sporadic   |
| Ga0181393_1165529bs                     | seasonal | seasonal   |
| Ga0181394_1015448bs                     | seasonal | seasonal   |
| Ga0181394_1042751bs                     | seasonal | seasonal   |
| Ga0181394_1048085bs                     | seasonal | sporadic   |
| Ga0181395_1059861bs                     | seasonal | seasonal   |
| Ga0181395_1130955bs                     | seasonal | sporadic   |
| Ga0181397_1049832bs                     | seasonal | occasional |
| Ga0181397_1055744bs                     | seasonal | seasonal   |
| Ga0181397_1090099bs                     | seasonal | occasional |
| Ga0181398_1003828bs                     | seasonal | occasional |
| Ga0181398_1003939bs                     | seasonal | occasional |
| Ga0181398_1005838bs                     | seasonal | occasional |
| Ga0181398_1007555bs                     | seasonal | seasonal   |
| Ga0181398_1033708bs                     | seasonal | seasonal   |

|           |           |          |            |
|-----------|-----------|----------|------------|
| Ga0181398 | 1085201bs | seasonal | occasional |
| Ga0181399 | 1002291bs | seasonal | seasonal   |
| Ga0181399 | 1017051bs | seasonal | occasional |
| Ga0181399 | 1040767bs | seasonal | seasonal   |
| Ga0181399 | 1054426bs | seasonal | seasonal   |
| Ga0181399 | 1173509bs | seasonal | seasonal   |
| Ga0181399 | 1263175bs | seasonal | occasional |
| Ga0181400 | 1003441bs | seasonal | sporadic   |
| Ga0181400 | 1014965bs | seasonal | seasonal   |
| Ga0181400 | 1044096bs | seasonal | sporadic   |
| Ga0181400 | 1085153bs | seasonal | occasional |
| Ga0181400 | 1199437bs | seasonal | occasional |
| Ga0181401 | 1000353bs | seasonal | occasional |
| Ga0181401 | 1061776bs | seasonal | occasional |
| Ga0181402 | 1014322bs | seasonal | occasional |
| Ga0181402 | 1209020bs | seasonal | seasonal   |
| Ga0181405 | 1002784bs | seasonal | occasional |
| Ga0181405 | 1007446bs | seasonal | sporadic   |
| Ga0181405 | 1023051bs | seasonal | sporadic   |
| Ga0181406 | 1014781bs | seasonal | seasonal   |
| Ga0181406 | 1017526bs | seasonal | sporadic   |
| Ga0181406 | 1055040bs | seasonal | seasonal   |
| Ga0181406 | 1213993bs | seasonal | occasional |
| Ga0181408 | 1007423bs | seasonal | occasional |
| Ga0181408 | 1019757bs | seasonal | seasonal   |
| Ga0181408 | 1063904bs | seasonal | sporadic   |
| Ga0181408 | 1124031bs | seasonal | sporadic   |
| Ga0181409 | 1055944bs | seasonal | sporadic   |
| Ga0181409 | 1076540bs | seasonal | seasonal   |
| Ga0181409 | 1083566bs | seasonal | sporadic   |
| Ga0181410 | 1000492bs | seasonal | sporadic   |
| Ga0181410 | 1010765bs | seasonal | seasonal   |
| Ga0181410 | 1016659bs | seasonal | seasonal   |
| Ga0181410 | 1123612bs | seasonal | sporadic   |
| Ga0181411 | 1008102bs | seasonal | sporadic   |
| Ga0181411 | 1014315bs | seasonal | seasonal   |
| Ga0181411 | 1036307bs | seasonal | seasonal   |
| Ga0181411 | 1041542bs | seasonal | seasonal   |
| Ga0181411 | 1100704bs | seasonal | occasional |
| Ga0181412 | 1000360bs | seasonal | sporadic   |
| Ga0181412 | 1020511bs | seasonal | occasional |
| Ga0181413 | 1001476bs | seasonal | sporadic   |
| Ga0181413 | 1014952bs | seasonal | occasional |
| Ga0181413 | 1015007bs | seasonal | sporadic   |
| Ga0181413 | 1021728bs | seasonal | sporadic   |
| Ga0181413 | 1062817bs | seasonal | sporadic   |
| Ga0181413 | 1129136bs | seasonal | occasional |
| Ga0181413 | 1208977bs | seasonal | occasional |
| Ga0181414 | 1014471bs | seasonal | occasional |
| Ga0181414 | 1014950bs | seasonal | sporadic   |
| Ga0181414 | 1020475bs | seasonal | sporadic   |
| Ga0181414 | 1100124bs | seasonal | occasional |
| Ga0181414 | 1111542bs | seasonal | sporadic   |
| Ga0181415 | 1000036bs | seasonal | occasional |
| Ga0181415 | 1007876bs | seasonal | sporadic   |
| Ga0181419 | 1006487bs | seasonal | sporadic   |



|                                         |            |                                  |
|-----------------------------------------|------------|----------------------------------|
| Ga0181419_1066017bs                     | seasonal   | occasional                       |
| Ga0181420_1027863bs                     | seasonal   | occasional                       |
| Ga0181420_1076274bs                     | seasonal   | occasional                       |
| Ga0181421_1069880bs                     | seasonal   | seasonal                         |
| Ga0181421_1150983bs                     | seasonal   | seasonal                         |
| Ga0181422_1020236bs                     | seasonal   | sporadic                         |
| Ga0181422_1056299bs                     | seasonal   | occasional                       |
| Ga0181424_10011512bs                    | seasonal   | seasonal                         |
| Ga0181425_1000096bs                     | seasonal   | sporadic                         |
| Ga0181425_1022215bs                     | seasonal   | sporadic                         |
| Ga0181426_1006399bs                     | seasonal   | sporadic                         |
| Ga0181426_1026699bs                     | seasonal   | sporadic                         |
| Ga0181427_1039755bs                     | seasonal   | occasional                       |
| Ga0181427_1219897bs                     | seasonal   | sporadic                         |
| Ga0181428_1035284bs                     | seasonal   | sporadic                         |
| Ga0181428_1045080bs                     | seasonal   | sporadic                         |
| Ga0181428_1061155bs                     | seasonal   | sporadic                         |
| Ga0181433_1038612bs                     | seasonal   | sporadic                         |
| Ga0181433_1051187bs                     | seasonal   | sporadic                         |
| Ga0187219_1003570bs                     | seasonal   | sporadic                         |
| Ga0187220_1016318bs                     | seasonal   | occasional                       |
| Ga0187220_1201201bs                     | seasonal   | sporadic                         |
| Ga0187221_1019522bs                     | seasonal   | sporadic                         |
| Ga0187221_1036632bs                     | seasonal   | sporadic                         |
| Ga0187221_1133050bs                     | seasonal   | seasonal                         |
| JAN2010meta_g43_contig_6_contig_7       | seasonal   | sporadic                         |
| JULY2013_g43_contig_1798_contig_1799    | seasonal   | occasional                       |
| JUNE2011_g43_contig_14284_contig_14285  | seasonal   | sporadic                         |
| JUNE2013_g43_contig_1892_contig_1893    | seasonal   | occasional                       |
| JUNE2013_g43_contig_1902_contig_1903    | seasonal   | occasional                       |
| KJ019085.1bs                            | seasonal   | sporadic                         |
| MAY2012_g43_contig_20_contig_21         | seasonal   | sporadic                         |
| NOV2011meta_g43_contig_6318_contig_6319 | seasonal   | sporadic                         |
| NOV2013_g43_contig_222_contig_223       | seasonal   | sporadic                         |
| SEPT2014_g43_contig_810_contig_811      | seasonal   | sporadic                         |
| APRIL2013_g43_contig_7638_contig_7639   | stochastic | Not found in cellular metagenome |
| AUG2009_g43_contig_2438_contig_2439     | stochastic | sporadic                         |
| AUG2012meta_g43_contig_112_contig_113   | stochastic | sporadic                         |
| AUG2013_g43_contig_13876_contig_13877   | stochastic | sporadic                         |
| DEC2009_g43_contig_20_contig_21         | stochastic | sporadic                         |
| DEC2011_g43_contig_8184_contig_8185     | stochastic | sporadic                         |
| DEC2012_g43_contig_4042_contig_4043     | stochastic | sporadic                         |
| DEC2012meta_g43_contig_7668_contig_7669 | stochastic | sporadic                         |
| DEC2013_g43_contig_50_contig_51         | stochastic | Not found in cellular metagenome |
| FEB2010meta_g43_contig_7140_contig_7141 | stochastic | sporadic                         |
| FEB2010meta_g43_contig_7396_contig_7397 | stochastic | sporadic                         |
| FEB2012_g43_contig_4036_contig_4037     | stochastic | sporadic                         |
| FEB2012meta_g43_contig_124_contig_125   | stochastic | sporadic                         |
| FEB2013meta_g43_contig_4410_contig_4411 | stochastic | sporadic                         |
| Ga0181379_1000597bs                     | stochastic | sporadic                         |
| Ga0181379_1002501bs                     | stochastic | sporadic                         |
| Ga0181379_1002687bs                     | stochastic | sporadic                         |
| Ga0181379_1003739bs                     | stochastic | sporadic                         |
| Ga0181379_1005592bs                     | stochastic | sporadic                         |
| Ga0181379_1019331bs                     | stochastic | sporadic                         |
| Ga0181379_1034898bs                     | stochastic | sporadic                         |

|                                           |            |                                  |
|-------------------------------------------|------------|----------------------------------|
| Ga0181379_1042486bs                       | stochastic | sporadic                         |
| Ga0181389_1076305bs                       | stochastic | sporadic                         |
| Ga0181394_1044996bs                       | stochastic | sporadic                         |
| Ga0181397_1015530bs                       | stochastic | sporadic                         |
| Ga0181402_1005406bs                       | stochastic | sporadic                         |
| Ga0181406_1056874bs                       | stochastic | sporadic                         |
| Ga0181414_1006279bs                       | stochastic | sporadic                         |
| Ga0181414_1011143bs                       | stochastic | sporadic                         |
| Ga0181414_1026333bs                       | stochastic | sporadic                         |
| Ga0181415_1001468bs                       | stochastic | occasional                       |
| Ga0181428_1114155bs                       | stochastic | sporadic                         |
| Ga0181433_1013728bs                       | stochastic | sporadic                         |
| Ga0181433_1066998bs                       | stochastic | Not found in cellular metagenome |
| Ga0187217_1063577bs                       | stochastic | sporadic                         |
| Ga0187219_1000539bs                       | stochastic | sporadic                         |
| Ga0187220_1067493bs                       | stochastic | sporadic                         |
| JAN2013meta_g43_contig_42_contig_43       | stochastic | sporadic                         |
| JUL2009meta_g43_contig_126_contig_127     | stochastic | sporadic                         |
| JUL2012meta_g43_contig_10380_contig_10381 | stochastic | sporadic                         |
| JULY2010_g43_contig_1590_contig_1591      | stochastic | sporadic                         |
| JUN2012meta_g43_contig_182_contig_183     | stochastic | sporadic                         |
| MAY2013_g43_contig_7148_contig_7149       | stochastic | occasional                       |
| NOV2011meta_g43_contig_2130_contig_2131   | stochastic | sporadic                         |
| NOV2011meta_g43_contig_28_contig_29       | stochastic | sporadic                         |
| OCT2012meta_g43_contig_1210_contig_1211   | stochastic | sporadic                         |
| OCT2012meta_g43_contig_2938_contig_2939   | stochastic | sporadic                         |
| OCT2012meta_g43_contig_86_contig_87       | stochastic | sporadic                         |

**Table S4.** R<sup>2</sup> values from variation partitioning analysis resolving the portion of host community variance explained by environmental variables and viral community structure in the virome and cellular metagenomes.

|                                                                                  | RDA                                               |                                             | Partial RDA                                                 |                                                     |                      |
|----------------------------------------------------------------------------------|---------------------------------------------------|---------------------------------------------|-------------------------------------------------------------|-----------------------------------------------------|----------------------|
|                                                                                  | Cyanobacteria community vs. environmental factors | Cyanobacteria community vs. viral community | Cyanobacterial vs. environmental factors alone (env virome) | Cyanobacterial vs. viral factors alone (virome env) | Unexplained Variance |
| <b>Host community level tested with viral community from virome</b>              |                                                   |                                             |                                                             |                                                     |                      |
| All host ecotype                                                                 | 0.34***                                           | 0.66***                                     | -0.02                                                       | 0.31*                                               | 0.35                 |
| All host ASV                                                                     | 0.48***                                           | 0.54***                                     | 0.13                                                        | 0.18                                                | 0.34                 |
| Syn. ecotype                                                                     | 0.33**                                            | 0.62***                                     | 0.03                                                        | 0.32*                                               | 0.35                 |
| Syn. ASV                                                                         | 0.23***                                           | 0.46***                                     | 0.02                                                        | 0.25**                                              | 0.52                 |
| Pro. Ecotype                                                                     | 0.73***                                           | 0.78**                                      | 0.12*                                                       | 0.17*                                               | 0.10                 |
| Pro. ASV                                                                         | 0.37***                                           | 0.44***                                     | 0.06                                                        | 0.13*                                               | 0.50                 |
| <b>Host community level tested with viral community from cellular metagenome</b> |                                                   |                                             |                                                             |                                                     |                      |
| All host ecotype                                                                 | 0.34***                                           | 0.30***                                     | 0.14                                                        | 0.10*                                               | 0.56                 |
| All host ASV                                                                     | 0.50***                                           | 0.51***                                     | 0.19*                                                       | 0.19**                                              | 0.3                  |
| Syn. ecotype                                                                     | 0.33**                                            | 0.42***                                     | 0.10*                                                       | 0.19**                                              | 0.48                 |
| Syn. ASV                                                                         | 0.23***                                           | 0.50***                                     | 0.06                                                        | 0.33***                                             | 0.44                 |
| Pro. Ecotype                                                                     | 0.70***                                           | 0.71***                                     | 0.17**                                                      | 0.17**                                              | 0.12                 |
| Pro. ASV                                                                         | 0.37***                                           | 0.54***                                     | 0.03                                                        | 0.21                                                | 0.43                 |

Asterisks indicate the level of ANOVA support for the estimated contribution to host variance: \*p < 0.05; \*\*p < 0.01; \*\*\*p ≤ 0.001

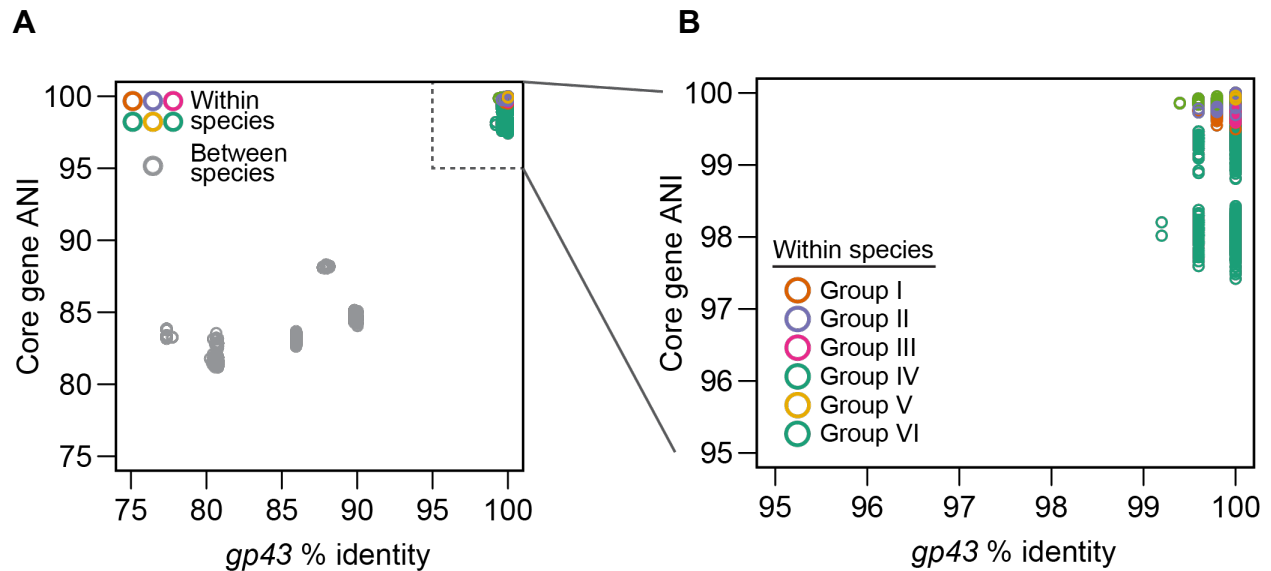

**Figure S1.** Comparison of *gp43* percent identity vs. core gene average nucleotide identity (ANI) among 142 complete T4-like cyanophage genomes from Gregory *et al.* 2016. Each point represents a pairwise comparison between two cyanophage strains where points are color coded according to interspecies (grey) or intraspecies (colors) comparisons. The six populations in this dataset referred to as Groups I-VI in Gregory *et al.* 2016 and represent species populations using the 95% ANI threshold in Deng *et al.* 2014. Panel **B** depicts a closer view of **A** (dashed box) at 95-100% *gp43* identity and ANI. *gp43* % identity was determined with blastn for the region amplified by the *gp43* primers gp43For and gp43Rev (see Methods in main text). ANI values were computed using 51 core genes as determined and analyzed in Gregory *et al.* 2016, requiring >60% alignment and >40% percent identity to be included in the average.

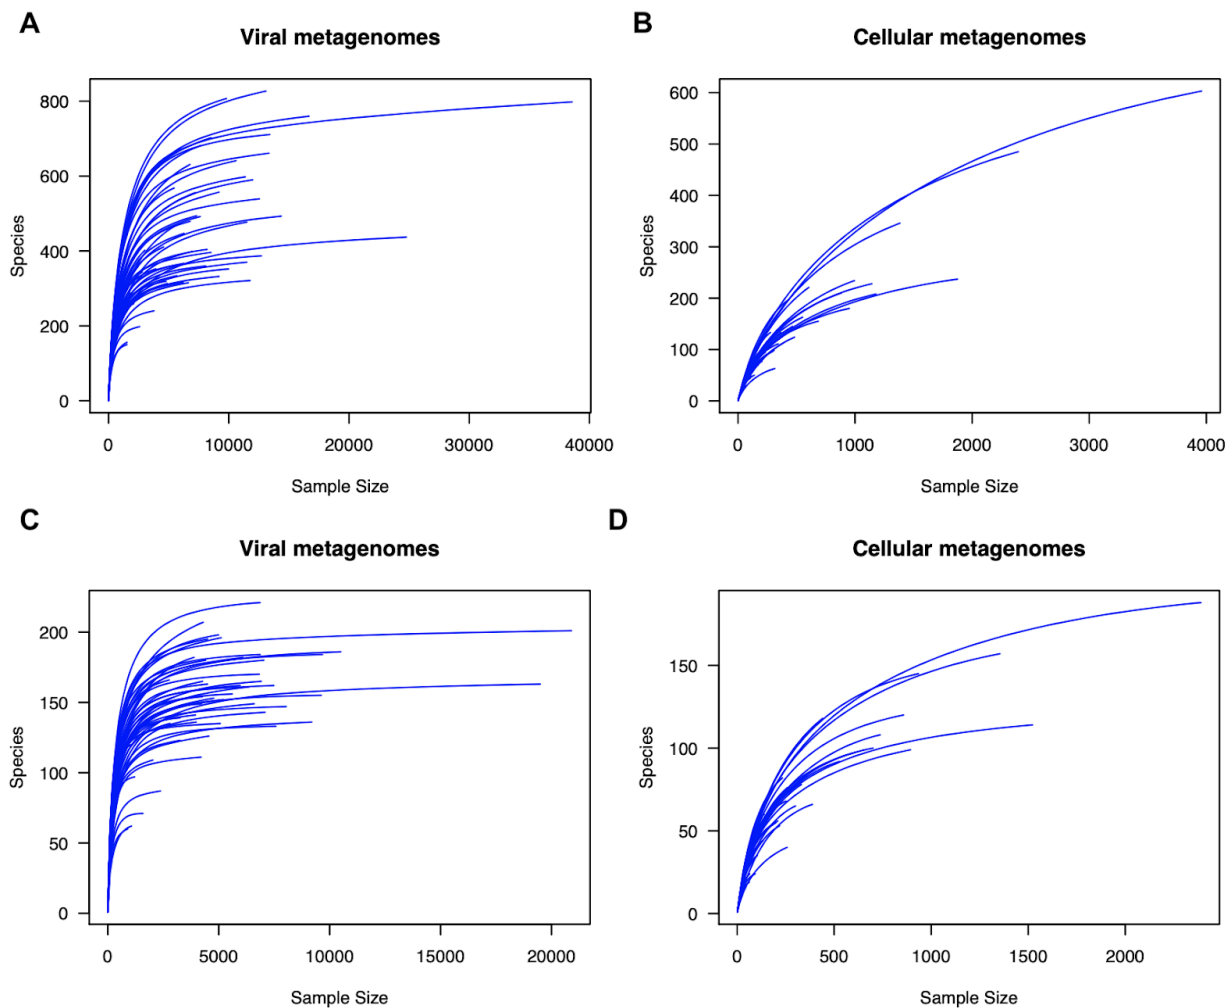

**Figure S2.** Rarefaction curves of *gp43* species for each viral metagenome (A,C) and cellular metagenome (B,D) using read counts for all *gp43* species detected (A,C) or for *gp43* species that were detected with 100% base coverage and 2-fold read coverage in any sample (B,D).

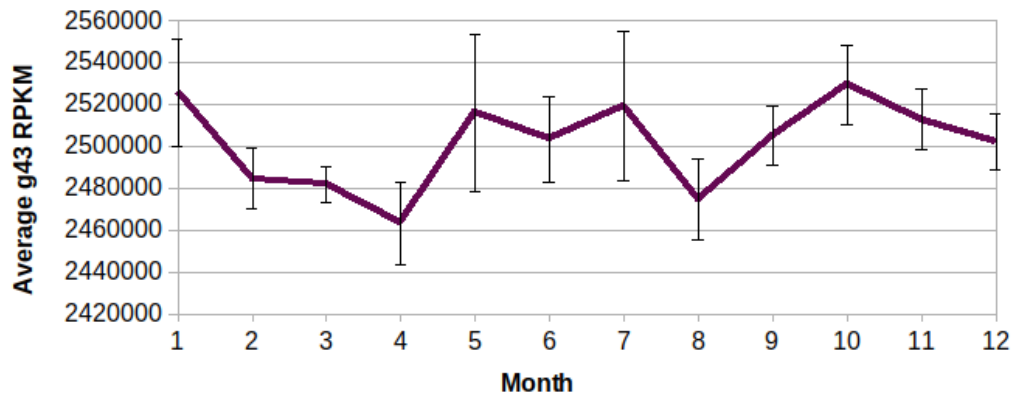

s

**Figure S3.** Average relative abundance of all T4-like cyanophages across the time series. Error bars are standard error.

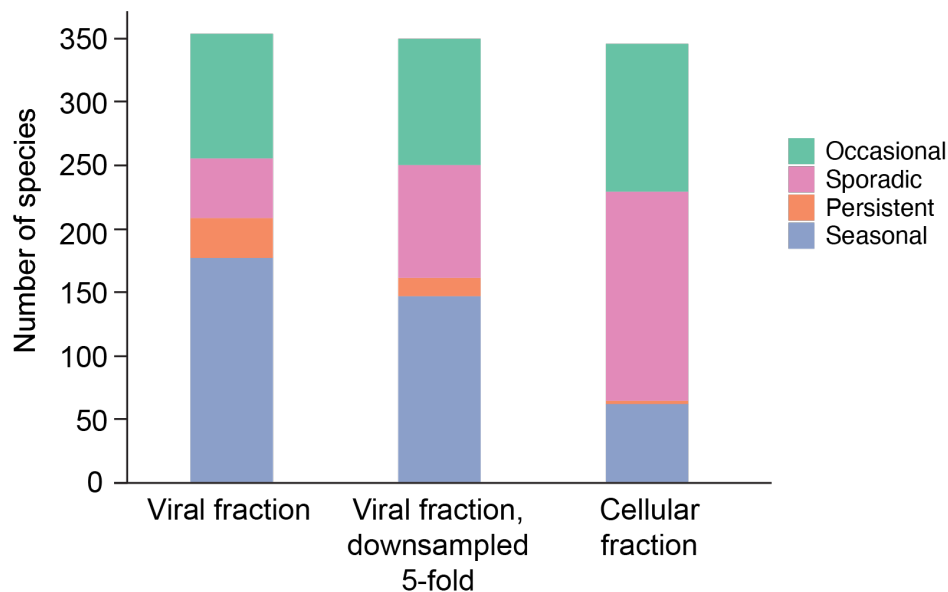

**Figure S4.** The number of species categorized to each dynamic class (seasonal, persistent, sporadic, and occasional) in the viral and cellular fraction metagenomes, as in Figure 3 (left and right), and when simulating 5-fold less sequencing depth for the viral fraction metagenomes (center). To simulate lower sequencing depth, read counts mapped to *gp43* species were divided by five and resulting values less than one were set to zero. Dynamic class categorization then was done as previously using resulting RPKM values (see Methods). Note that a small number of species found in the viral fraction metagenome (not downsampled) were not detected in the cellular fraction and viral fraction downsampled results,  $n=7$  and 4 respectively.

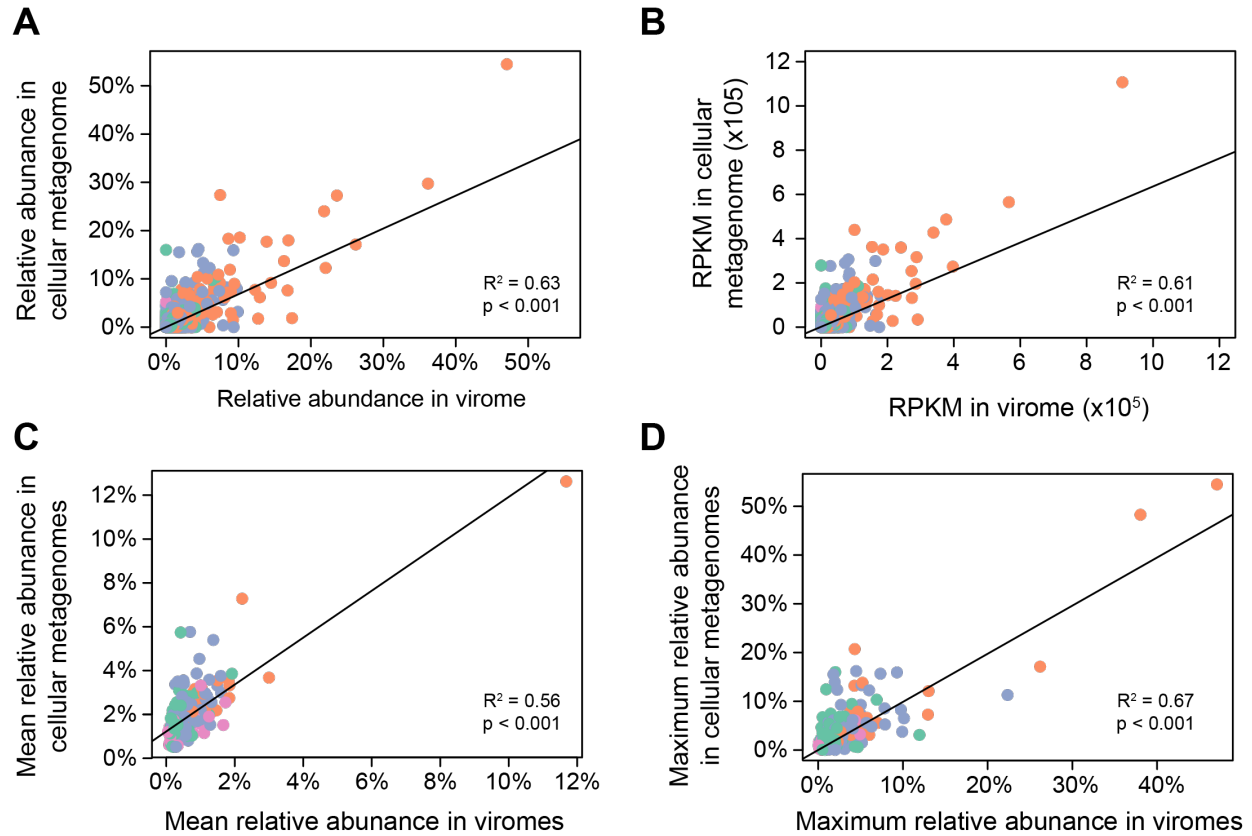

**Figure S5.** Scatter plots of RPKM (A) and relative abundance (B) and mean (C) and maximum (D) relative abundances of T4-like cyanophage species in the viral (x-axis) and cellular fraction metagenomes (y-axis). In A and B, each point represents the abundance for each species at each time point for months for which both viral and cellular metagenomes were available ( $n=11,427$  points). In C and D, each of the points represents one of the 347 species that were detected in both the viral and cellular fraction metagenomes, and each point depicts the corresponding mean relative abundance (A; for months when the species was detected) or maximum relative abundance (B) for that species across the viral and cellular fraction metagenomes. Points are colored by their dynamic class as categorized in the viral metagenomes. Lines depict linear regressions of the data, and  $R^2$  and  $p$ -values for the regressions are provided in the lower right of each panel.
